# Supplementary material for: Dual-metal-doped high crystalline carbon nitride with cyano groups for enhanced photocatalytic hydrogen evolution
Source: Royal Society of Chemistry journal article supplement (doi:10.1039/d5dt00285k), 2025-01-01
Supplement: d5dt00285k1.pdf [file d5dt00285k1.pdf]

Dual-metal-doped high crystalline carbon nitride with cyano groups for  
enhanced photocatalytic hydrogen evolution

Lu Chen<sup>a</sup>, Kaijie Zhang<sup>a</sup>, Yuzhou Xia<sup>a</sup>, Guiyang Yan<sup>a</sup>, Feng Chen<sup>a\*</sup>, Xiyao Liu<sup>a\*</sup>,

Renkun Huang<sup>a\*</sup>

<sup>a</sup> Fujian Provincial Key Laboratory of Featured Materials in Biochemical Industry, Ningde Normal  
University, Ningde 352100, China

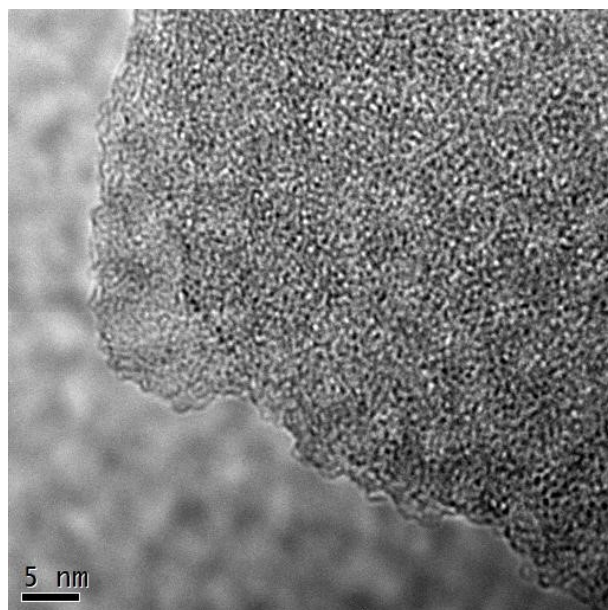

Fig. S1 HRTEM image of CN

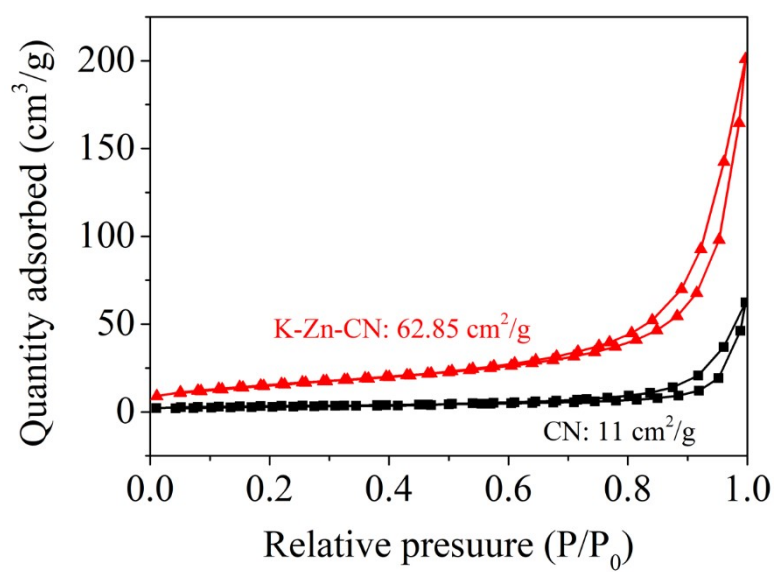

Fig. S2 N<sub>2</sub> adsorption–desorption isotherms of CN ad K-Zn-CN
